# Chewing Betel Quid and the Risk of Metabolic Disease, Cardiovascular Disease, and All-Cause Mortality: A Meta-Analysis

Tomohide Yamada, Kazuo Hara\*, Takashi Kadowaki

Department of Diabetes and Metabolic Diseases, Graduate School of Medicine, University of Tokyo, Tokyo, Japan

## Abstract

**Background:** Betel nut (Areca nut) is the fruit of the Areca catechu tree. Approximately 700 million individuals regularly chew betel nut (or betel quid) worldwide and it is a known risk factor for oral cancer and esophageal cancer. We performed a meta-analysis to assess the influence of chewing betel quid on metabolic diseases, cardiovascular disease, and all-cause mortality.

**Methodology/Principal Findings:** We searched Medline, Cochrane Library, Web of Science, and Science Direct for pertinent articles (including the references) published between 1951 and 2013. The adjusted relative risk (RR) and 95% confidence interval were calculated using the random effect model. Sex was used as an independent category for comparison.

**Results:** Of 580 potentially relevant studies, 17 studies from Asia (5 cohort studies and 12 case-control studies) covering 388,134 subjects (range: 94 to 97,244) were selected. Seven studies (N=121,585) showed significant dose-response relationships between betel quid consumption and the risk of events. According to pooled analysis, the adjusted RR of betel quid chewers vs. non-chewers was 1.47 ( $P<0.001$ ) for obesity (N=30,623), 1.51 ( $P=0.01$ ) for metabolic syndrome (N=23,291), 1.47 ( $P<0.001$ ) for diabetes (N=51,412), 1.45 ( $P=0.06$ ) for hypertension (N=89,051), 1.2 ( $P=0.02$ ) for cardiovascular disease (N=201,488), and 1.21 ( $P=0.02$ ) for all-cause mortality (N=179,582).

**Conclusion/Significance:** Betel quid chewing is associated with an increased risk of metabolic disease, cardiovascular disease, and all-cause mortality. Thus, in addition to preventing oral cancer, stopping betel quid use could be a valuable public health measure for metabolic diseases that are showing a rapid increase in South-East Asia and the Western Pacific.

**Citation:** Yamada T, Hara K, Kadowaki T (2013) Chewing Betel Quid and the Risk of Metabolic Disease, Cardiovascular Disease, and All-Cause Mortality: A Meta-Analysis. PLoS ONE 8(8): e70679. doi:10.1371/journal.pone.0070679

**Editor:** Antony Bayer, Cardiff University, United Kingdom

**Received:** March 7, 2013; **Accepted:** June 20, 2013; **Published:** August 5, 2013

**Copyright:** © 2013 Yamada et al. This is an open-access article distributed under the terms of the Creative Commons Attribution License, which permits unrestricted use, distribution, and reproduction in any medium, provided the original author and source are credited.

**Funding:** The authors have no funding or support to report.

**Competing Interests:** The authors have declared that no competing interests exist.

\* E-mail: thara-tyk@umin.ac.jp

## Introduction

Obesity has rapidly become a modern epidemic, with one billion people worldwide being either overweight or obese [1]. In particular, abdominal obesity is associated with insulin resistance that often leads to type 2 diabetes mellitus. Insulin resistance, its associated hyperinsulinemia and hyperglycemia, and the cytokines produced by adipose tissue (adipokines) can also provoke vascular endothelial dysfunction, dyslipidemia, hypertension, and vascular inflammation, all of which promote the development of atherosclerotic cardiovascular disease (CVD) [2,3].

In Asia, the prevalence of obesity, diabetes, and metabolic disease has increased rapidly in recent years, partly as a result of rapid socioeconomic development [4,5].

Asia already has 60% of the world's diabetic population and diabetes is increasing more rapidly in Asia than anywhere else [6]. Such metabolic diseases have a crucial influence on public health, since a modest increase in the risk of morbidity and mortality [7] translates into a substantial social burden, so prevention of these diseases is extremely important.

Betel nut (Areca nut) is the fruit of the Areca catechu tree, which grows in Asia, the tropical Pacific region, and parts of east Africa. It is a major ingredient of betel quid (BQ), which generally consists of areca nut, betel leaf, catechu, slaked lime, and sometimes tobacco [8]. Chewing BQ is common in Central Asian, South Asian, and South-east Asian countries, including Bangladesh, China, India, Pakistan, Philippines, Sri Lanka, Taiwan, and Vietnam [9]. In fact, it has been estimated that 700 million individuals (approximately 10% of the world's population) chew BQ regularly and it is thought to be the fourth most commonly used psychoactive substance in the world [10].

There are four main arecal alkaloids (arecoline, arecaidine, guvacine, and guvacoline) in betel nut, with arecoline being the main component. These alkaloids bind to GABA receptors in the brain to trigger psychoactive effects such as a sensation of alertness and well-being, but also dizziness [11,12].

The nitrosated compounds that form when these alkaloids are exposed to gastric acid in the presence of nitrates released by oral bacteria are carcinogenic, and are also similar in structure to various nitrosamines that are well known to be diabetogenic [11].

In fact, the WHO International Agency for Research on Cancer Monograph Working Group has reported that chewing BQ is a known risk factor for oral cancer and esophageal cancer [13].

It was recently proposed that there is an association between inflammatory oral conditions and systemic disorders [14]. Numerous studies have shown that chewing BQ is associated with the risk of various systemic diseases (including metabolic disease, cardiovascular disease, and all-cause mortality), as well as oral diseases, and have generally identified a positive association, although its magnitude has varied [15–31].

Thus, clarifying the relationship between chewing BQ and metabolic disease may be important for the development of preventive strategies. Accordingly, we performed a meta-analysis to confirm the influence of chewing BQ on metabolic disease, cardiovascular disease, and all-cause mortality.

## Methods

### Searches

To identify observational studies that had investigated the association between chewing BQ and metabolic disease, cardiovascular disease, and/or all-cause mortality, the electronic databases of Medline, Cochrane Library, Web of Science, and Science Direct were searched from January 1, 1951 until January 30, 2013 using the following key words: (areca nut OR betel nut OR betel quid) AND (mortality OR hypertension OR metabolic OR diabetes OR obesity OR dyslipidemia OR coronary OR heart OR cardiovascular disease). Reference lists of the articles thus identified were also reviewed.

### Selection

Initial screening was based on study titles or abstracts, while subsequent detailed screening employed full-text review. Cohort studies, case-control studies, and cross-sectional studies that assessed the relation between chewing BQ and metabolic disease (obesity, metabolic syndrome, diabetes, hypertension, and dyslipidemia), cardiovascular disease, and all-cause mortality were eligible for inclusion if the following criteria were met: 1) the full text of the report was published in English; 2) the influence of chewing BQ on the relative risk (risk ratio, hazard ratio, or odds ratio) of events was reported with confidence intervals; and 3) the definitions of events were reported.

### Assessment of Validity

To assess the validity of the studies thus identified, each report was appraised with reference to the STROBE statement (an established checklist of items that should be included in articles reporting observational research comprising several study designs and many topic areas) [32]. The Newcastle-Ottawa Scale for assessing the quality of nonrandomized studies in meta-analyses was also used to quantify the validity of each study. This scale is employed to judge a study in three broad areas: selection of the study groups, comparability of the groups, and the method of ascertaining either the exposure or outcome of interest for case-control or cohort studies, respectively [33].

### Data Extraction

Two independent investigators (T.Y. and K.H.) reviewed each study to determine its eligibility and then extracted and tabulated all of the relevant data. Disagreement was resolved by consensus between the two investigators.

The following information was obtained from each study: first author, year of publication, type of study, country, exposure,

events, follow-up period, number of subjects, adjustment factors, relative risk, and definitions of events.

### Statistical Analysis

The pooled relative risk (RR) adjusted for possible confounders and its 95% confidence interval (CI) was calculated for each of the events assessed in each study by the DerSimonian-Laird random-effect model weighted with inverse variance. We employed the sex and the ethnic group as independent categories for comparison within each study. In Lin's study [27], RRs were determined separately for low versus high consumption of BQ. Therefore, we first performed an internal meta-analysis to combine the RR data and then used the combined values for the main meta-analysis. If a study included RRs for both current BQ chewers and ex-chewers, we used the data for current chewers.

We also carried out additional analyses of the studies performed in men with respect to obesity, metabolic syndrome, cardiovascular disease, and all-cause mortality.

Cochrane's  $\chi^2$  test and the  $I^2$  test were used to evaluate heterogeneity among the studies [34].

Publication bias was evaluated by creating a funnel plot of the effect size versus standard error (SE) for each study, and funnel plot asymmetry was assessed by Begg's test and Egger's test. All statistical analyses were performed with Stata 12.0 software (StataCorp, College Station, TX). Results are expressed as the mean with 95%CI, unless otherwise indicated. A *P* value of less than 0.05 was considered significant. All procedures were performed in accordance with the guideline for the meta-analysis of observational studies in epidemiology [35] and the PRISMA statement [36] (**Checklist S1**).

## Results

### Search Results

**Figure 1** shows a flow chart of the study selection process. We identified a total of 580 reports by the database searches, among which 495 reports were excluded after review of the title and abstract, leaving 85 studies for further evaluation. Sixty-eight of these 85 studies were excluded after full-text evaluation, chiefly because of the lack of pertinent data. The remaining 17 studies (5 cohort studies and 12 cross-sectional studies covering 388,134 subjects with 22 comparison categories) [15–31] conformed to the selection criteria and were used in this meta-analysis.

### Study Characteristics

**Table 1** lists the characteristics of the studies. There were 7 comparison categories in the reports about obesity [21,24–27], as well as 4 categories for metabolic syndrome [29–31], 4 categories for hypertension [20,21], 2 categories for diabetes [22,23], 3 categories for dyslipidemia [28,30,31], 6 categories for cardiovascular disease [15–19], and 5 categories for all-cause mortality [15–18].

Although Guh et al. [30] and Yen et al. [31] described the risks for high blood pressure (systolic blood pressure  $\geq 130$  mmHg and/or diastolic blood pressure  $\geq 85$  mmHg) and hyperglycemia (fasting plasma glucose  $\geq 100$  mg/dl), these criteria differed from those used to define hypertension and diabetes. Accordingly, we excluded their data from the present meta-analysis.

All of the studies were performed in Asia and were published between 2004 and 2012. Fifteen studies [16–20,22–31] were conducted in China (including Taiwan), while 1 was done in the India [15] and 1 was performed in Bangladesh [21]. The size of the study population ranged from 94 to 97,244 subjects (mean:

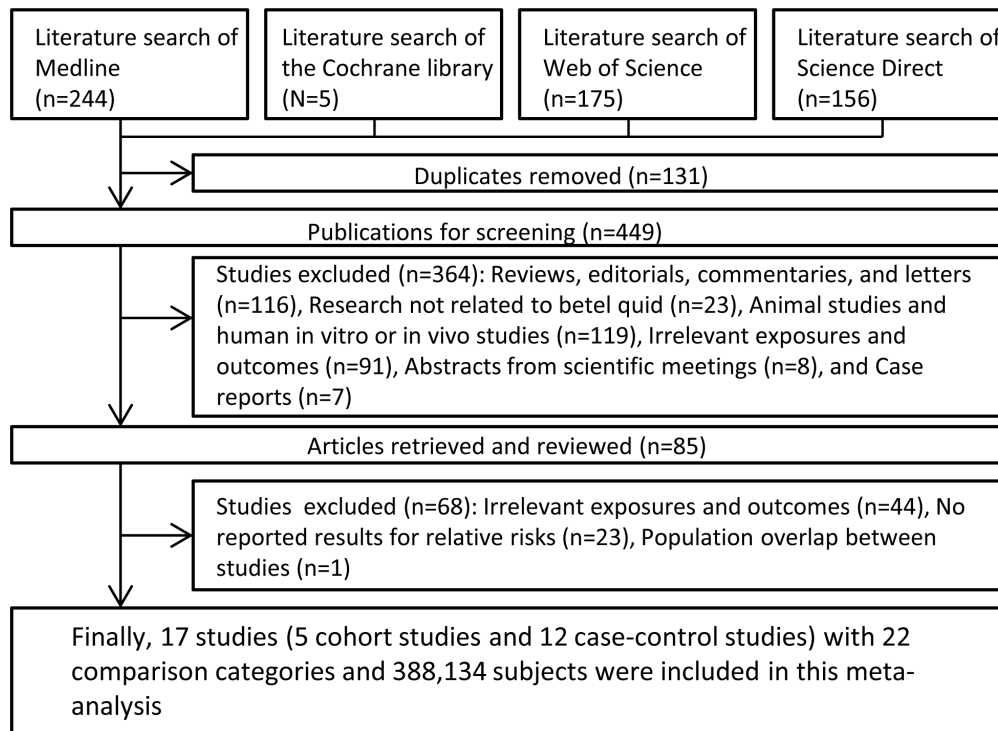

**Figure 1. Flow diagram of study selection.**

doi:10.1371/journal.pone.0070679.g001

22,831 subjects). The mean follow-up period ranged from 2.72 to 12.1 years.

### Study Quality

Study quality scores are shown in **Table S1**. Most of the studies achieved high scores (at least 7 out of 9 points) for quality. The Newcastle Ottawa score was 5 for one study, 6 for three studies, 7 for seven studies, 8 for three studies, and 9 for three studies. Some case-control studies were not allocated a score because a questionnaire or interview was used without blinding to evaluate BQ chewing. In most of the case-control studies, non-response rates were not reported separately for each group.

### Quantitative Data Synthesis (Meta-analysis)

**1. Obesity.** A total of 5 studies reported on obesity using 7 categories for comparison [21,24–27]. All 5 were case-control studies. Four studies [24–27] were performed in China (including Taiwan) and one was done in Bangladesh [21]. These studies included 30,623 subjects. Three studies were limited to men [21,24,27]. The definition of obesity varied, since it was defined as a BMI  $\geq 27$  kg/m<sup>2</sup> in two studies [24,26] and as a BMI  $\geq 25$  kg/m<sup>2</sup> in two studies [21,27]. Lin [25] only analyzed Taiwanese aborigines, while Ho [26] analyzed Taiwanese aborigines and non-aborigines separately. Lin [27] found a significant dose-response relationship between BQ consumption and obesity.

**Figure 2-A** shows the results obtained with the random effects model by combining the RRs for obesity. Across the 7 comparison categories [21,24–27], the adjusted RR for BQ chewers compared with non-chewers was 1.47 (95% CI: 1.23 to 1.75;  $P < 0.001$ ;  $I^2 = 47\%$ ;  $P$  for heterogeneity = 0.08) with non-significant heterogeneity. Analysis restricted to studies of men [21,24,27] showed a similar RR of 1.49 (95% CI: 1.03 to 2.15;  $P = 0.04$ ). Analysis of only the studies performed in Taiwan [24–27] gave an RR of 1.58

(95% CI: 1.42 to 1.75;  $P < 0.001$ ) along with a decrease of heterogeneity ( $I^2 = 0\%$ ;  $P$  for heterogeneity = 0.66). Analysis restricted to aborigines [25,26] revealed an RR of 1.57 (95% CI: 1.3 to 1.9;  $P < 0.001$ ;  $I^2 = 7\%$ ;  $P$  for heterogeneity = 0.3).

**2. Metabolic syndrome.** Three studies [29–31] reported on metabolic syndrome using 4 comparison categories. All four studies were performed in China (Taiwan) and there were 23,291 subjects. Chung [29] only investigated aborigines. In all three studies, metabolic syndrome was defined according to National Cholesterol Education Program Adult Treatment Panel III criteria [37]. Two of the three studies [30,31] identified a significant dose-response relationship between BQ consumption and metabolic syndrome.

Across the 4 comparison categories, the adjusted RR for BQ chewers compared with non-chewers was 1.51 (95% CI: 1.09 to 2.10;  $P = 0.01$ ;  $I^2 = 82\%$ ;  $P$  for heterogeneity = 0.001) (**Figure 2-B**). Analysis restricted to studies of men [29,31] yielded a similar result, with an RR of 1.79 (95% CI: 1.54 to 2.08;  $P < 0.001$ ).

**3. Type 2 diabetes.** There were 2 case-control studies employing 2 comparison categories that assessed type 2 diabetes [22,23]. These studies included 51,412 subjects, all of whom were men, and diabetes was diagnosed according to American Diabetes Association criteria [38] in both studies. Tung [22] demonstrated a significant dose-response relationship between BQ consumption and type 2 diabetes.

Across the two studies, the adjusted RR for diabetes in BQ chewers compared with non-chewers was 1.47 (95% CI: 1.2–1.81;  $P < 0.001$ ;  $I^2 = 72\%$ ;  $P$  for heterogeneity = 0.06) with non-significant heterogeneity (**Figure 2-C**).

**4. Dyslipidemia.** There were 3 case-control studies employing 3 comparison categories that assessed the risk of dyslipidemia (hypertriglyceridemia and low HDL cholesterolemia) related to chewing betel quid [28,30,31]. These studies included 21,919

**Table 1.** Summary of studies evaluating the association of chewing betel quid with metabolic disease, cardiovascular disease, and all-cause mortality.

| Author, Year, Country                        | Study type   | Exposure                       | Event and Relative risk (95% CI)                                                                                           | Follow-up (yrs) | Number of subjects                                        |
|----------------------------------------------|--------------|--------------------------------|----------------------------------------------------------------------------------------------------------------------------|-----------------|-----------------------------------------------------------|
| Gupta 2005, India (15) <sup>a</sup>          | Cohort       | Betel quid (areca nut, mishri) | All-cause mortality: (men) 1.1 (0.98–1.24), (women) 0.96 (0.83–1.11) CVD: (men) 0.94 (0.82–1.09), (women) 1.19 (1.02–1.38) | 5.5             | 97,244 (men and women)                                    |
| Wen 2005, China (Taiwan) (16) <sup>b</sup>   | Cohort       | Betel quid                     | All-cause mortality: (men) 1.5 (1.3–1.7) CVD: (men) 1.1 (0.8–1.6)                                                          | 12.1            | 19,719 men                                                |
| Lan 2007, China (Taiwan) (17) <sup>c</sup>   | Cohort       | Betel quid                     | All-cause mortality: 1.19 (1.05–1.35)* CVD: 1.41 (1.12–1.77)                                                               | 9.5             | 6,503 (3,577 men and 2,926 women)                         |
| Lin 2008, China (Taiwan) (18) <sup>d</sup>   | Cohort       | Betel quid                     | All-cause mortality: 1.4 (1.16–1.7)* CVD: 2.02 (1.31–3.13)*                                                                | 8.0             | 56,116 men                                                |
| Yen 2008, China (Taiwan) (19) <sup>e</sup>   | Cohort       | Betel quid                     | CVD: 1.15 (0.99–1.33)*                                                                                                     | 2.72            | 21,906 men                                                |
| Tseng 2008, China (Taiwan) (20) <sup>f</sup> | Case-control | Betel quid                     | Hypertension: (men) 1.07 (1.01–1.13), (women) 1.90 (1.53–2.35)                                                             | –               | 81,226 (37,226 men and 44,000 women with type 2 diabetes) |
| Heck 2012, Bangladesh (21) <sup>g</sup>      | Case-control | Betel quid                     | Hypertension: (men) 1.36 (0.73–2.53), (women) 1.67 (1.08–2.60) Obesity: (men) 0.5 (0.15–1.67), (women) 0.63 (0.3–1.34)     | –               | 7,785 men and women                                       |
| Tung 2004, China (Taiwan) (22) <sup>h</sup>  | Case-control | Betel quid                     | Type 2 diabetes: 1.29 (1.04–1.60)*                                                                                         | –               | 14,186 men                                                |
| Tseng 2010, China (Taiwan) (23) <sup>i</sup> | Case-control | Betel quid                     | Type 2 diabetes: 1.6 (1.50–1.71)                                                                                           | –               | 37,226 men                                                |
| Chang 2006, China (Taiwan) (24) <sup>j</sup> | Case-control | Betel quid                     | Obesity: 1.48 (1.2–1.81)                                                                                                   | –               | 6,126 men                                                 |
| Lin 2006, China (Taiwan) (25) <sup>k</sup>   | Case-control | Betel quid                     | Obesity: (Aborigine) 1.61 (1.40–1.85)                                                                                      | –               | 7,144 (3,824 men and 3,320 women)                         |
| Ho 2007, China (Taiwan) (26) <sup>l</sup>    | Case-control | Betel quid                     | Obesity: (Aborigines) 1.09 (0.53–2.25). (Non-aborigines) 1.55 (1.17–2.06)                                                  | –               | 8,519 (4,326 men and 4,193 women)                         |
| Lin 2009, China (Taiwan) (27) <sup>m</sup>   | Case-control | Betel quid                     | Obesity: 1.89 (1.31–2.72)*                                                                                                 | –               | 1,049 men                                                 |
| Hsu 2010, China (Taiwan) (28) <sup>n</sup>   | Case-control | Betel quid                     | Hypertriglyceridemia: 18.4 (1.19–283) Low HDL cholesterolemia: 5.4 (0.21–35.6)                                             | –               | 94 (52 men and 42 women)                                  |
| Chung 2006, China (Taiwan) (29) <sup>o</sup> | Case-control | Betel quid                     | Metabolic syndrome: (Aboriginal men) 1.92 (1.15–3.27), (Aboriginal women) 1.6 (1.03–2.5)                                   | –               | 1,466 (men and women)                                     |
| Guh 2006, China (Taiwan) (30) <sup>p</sup>   | Case-control | Betel quid                     | Metabolic syndrome: 1.06 (0.89–1.30)* Hypertriglyceridemia: 1.2 (0.9–1.5) Low HDL cholesterolemia: 0.86 (0.66–1.1)         | –               | 1,986 (920 men and 1,066 women)                           |
| Yen 2006, China (Taiwan) (31) <sup>q</sup>   | Case-control | Betel quid                     | Metabolic syndrome: 1.78 (1.53–2.08)* Hypertriglyceridemia: 1.9 (1.66–2.19) Low HDL cholesterolemia: 0.95 (0.78–1.15)      | –               | 19,839 men                                                |

CVD, cardiovascular disease; CI, confidence interval;

<sup>a</sup>Adjusted for age and education.<sup>b</sup>Adjusted for age, alcohol, and education.<sup>c</sup>Adjusted for gender, age, living area, hypertension, anemia, heart disease, liver disease, arthritis, physical difficulty, smoking, and alcohol.<sup>d</sup>Adjusted for age, BMI, diabetes, hypertension, cholesterol, triglycerides, alcohol, smoking, physical activity, income, and education.<sup>e</sup>Adjusted for age, education, occupation, smoking, alcohol, intake of fish, milk, coffee, physical activity, and family history.<sup>f</sup>Adjusted for age, diabetes duration, BMI, and smoking.<sup>g</sup>Adjusted for age, tobacco smoking (pack-years), BMI at baseline, use of antihypertensive medications at follow-up, education, land ownership, religion, marital status, and daily intake of meat, vegetables, and fruit.<sup>h</sup>Adjusted for age, obesity, hypertension, physical activity, education, occupation, total cholesterol, triglycerides, creatinine, uric acid, BMI, and log-transformed BUN.<sup>i</sup>Unadjusted.<sup>j</sup>Adjusted for hypertension, diabetes, exercise, sedentary job, alcohol, and smoking.<sup>k</sup>Adjusted for sex, age, education, marital status, ethnicity, alcohol consumption, and smoking.<sup>l</sup>Adjusted for sex, age, marital status, education, income, alcohol (frequency of intake), smoking, and physical activity.<sup>m</sup>Adjusted for age, diabetes, hypertension, total cholesterol, high-density lipoprotein cholesterol, triacylglycerol, smoking, alcohol drinking, physical activity, income, and educational level.<sup>n</sup>Adjusted for age, sex, and BMI.<sup>o</sup>Adjusted for age, educational level, socioeconomic level, exercise, drinking, and smoking status.<sup>p</sup>Adjusted for sex, age, smoking, alcohol drinking, dietary intake, and physical activity.<sup>q</sup>Adjusted for age, education, physical activity, occupation, smoking habits, alcohol intake, dietary factors, and family history of diabetes, hypertension, and cerebrovascular and cardiovascular disease in second-degree relatives.

\*Significant dose-response relationship between chewing betel quid and the event.

doi:10.1371/journal.pone.0070679.t001

**A) Obesity**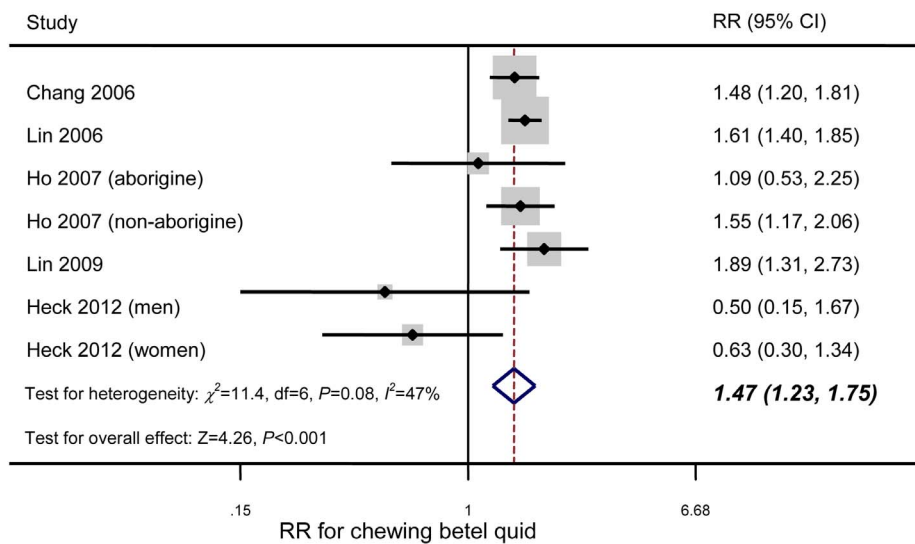**B) Metabolic syndrome**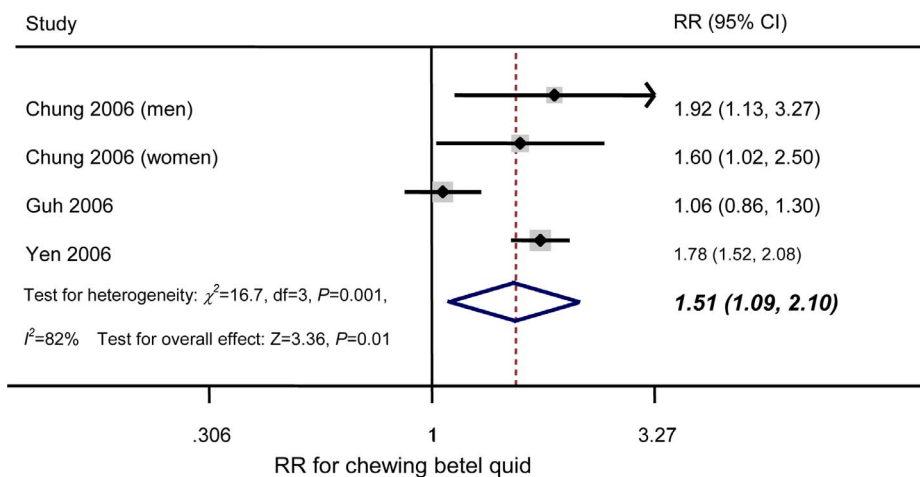**C) Type 2 diabetes**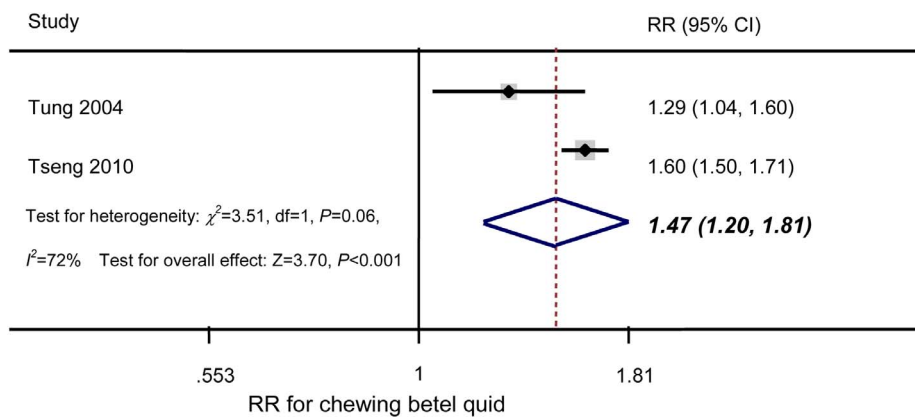

**Figure 2. Association of chewing betel quid with obesity, metabolic syndrome, and type 2 diabetes.** Forest plots show the association between chewing betel quid and the risk of obesity, metabolic syndrome, or type 2 diabetes. CI=confidence interval; RR=relative risk. doi:10.1371/journal.pone.0070679.g002

subjects. The adjusted RR for hypertriglyceridemia in BQ chewers compared with non-chewers was significant at 1.64 (95% CI: 1.01 to 2.64;  $P=0.04$ ;  $I^2=86\%$ ;  $P$  for heterogeneity = 0.001), but the RR for low HDL cholesterolemia was not significant at 0.94 (95% CI: 0.73 to 1.21;  $P=0.62$ ;  $I^2=47\%$ ;  $P$  for heterogeneity = 0.15).

**5. Cardiovascular disease.** Five studies with 6 comparison categories [15–19] and 201,488 subjects included data on cardiovascular disease. All five were cohort studies. The follow-up period ranged from 2.72 years to 12.1 years (mean: 7.6 years). In most studies [15–18], cardiovascular disease was defined as a disease of the circulatory system according to the International Classification of Diseases (ICD) death registry system. Lin [18] and Yen [19] found a significant dose-response relationship between BQ consumption and cardiovascular disease.

**Figure 3-A** displays the results. Across the six comparison categories, the adjusted RR for cardiovascular disease in BQ chewers compared with non-chewers was 1.2 (95% CI: 1.03–1.4;  $P=0.02$ ;  $I^2=70\%$ ;  $P$  for heterogeneity = 0.005). Analysis restricted to studies of men [15,16,18,19] revealed a similar result, with an RR of 1.17 (95% CI: 0.93 to 1.47;  $P=0.19$ ), but the association was not significant.

**6. All-cause mortality.** Four studies investigated all-cause mortality using 5 comparison categories [15–18]. All four were cohort studies, there were 179,582 subjects, and the follow-up period ranged from 5.5 to 12.1 years (mean: 8.8 years). All-cause mortality was confirmed according to the ICD system. Lan [17] and Lin [18] found a significant dose-response relationship between BQ consumption and all-cause mortality.

Across the 5 comparison categories, the adjusted RR for all-cause mortality in BQ chewers compared with non-chewers was 1.21 (95% CI: 1.04–1.42;  $P=0.02$ ;  $I^2=85\%$ ;  $P$  for heterogeneity < 0.001). Analysis restricted to studies of men [15,16,18] gave a similar result, with an RR of 1.32 (95% CI: 1.07 to 1.63;  $P=0.01$ ) (**Figure 3-B**).

**7. Hypertension.** Two case-control studies with 89,051 subjects assessed hypertension using 4 comparison categories [20,21]. Tseng [20] only investigated patients with concomitant diabetes. Hypertension was defined as a systolic blood pressure  $\geq 140$  mmHg and/or diastolic blood pressure  $\geq 90$  mmHg in both studies.

Across the 2 studies, the adjusted RR for hypertension in BQ chewers compared with non-chewers was 1.45 (95% CI: 0.98 to 2.15;  $P=0.06$ ;  $I^2=90\%$ ;  $P$  for heterogeneity < 0.001) (**Figure 3-C**).

## Publication Bias

The funnel plot, Begg's test, and Egger's test were used to evaluate the potential influence of publication bias on the association between BQ chewing and metabolic disease, cardiovascular disease, and all-cause mortality. The funnel plot did not have an asymmetric pattern, and Egger's test and Begg's test both revealed no significant publication bias (all  $P \geq 0.05$ ).

## Discussion

The present meta-analysis of 17 Asian studies demonstrated that chewing BQ is associated with an increased risk of obesity, diabetes, metabolic syndrome, cardiovascular disease, and all-cause mortality. These findings have certain implications for the prevention of metabolic diseases, especially in view of the recent

rapid increase in the prevalence of such diseases in South-East Asia and the Western Pacific.

It was recently suggested that there is an association between inflammatory oral conditions and systemic disorders [14]. Several studies have shown that poor periodontal health is associated with conditions such as diabetes, cardiovascular disease, kidney disease, and low birth weight [14,39,40].

A previous meta-analysis [41] investigated the relation between chewing various substances with/without tobacco and the risk of cardiovascular disease, but it assessed the role of chewing tobacco in addition to BQ. In addition, a meta-analysis of the overall risk of metabolic diseases (including obesity, metabolic syndrome, hypertension, diabetes, dyslipidemia) and all-cause mortality associated with chewing BQ has not been performed before.

## Link between Chewing BQ and Systemic Disease

The exact mechanism that links chewing BQ with systemic disease remains unclear, although various mechanisms have been proposed. Nitrosated arecal alkaloid derivatives are proven carcinogens that have been demonstrated to induce tumors throughout the foregut in animals, are also associated with an increased risk of tumorigenesis in humans [8]. When administered intravenously, these alkaloids target organs derived from the foregut such as the brain, nasopharynx, oropharynx, stomach, liver, lungs, and pancreas [11]. This means that the effects of chewing BQ are not limited to tissues with which the quid and its components make direct contact (e.g., the oral cavity and esophagus).

Indeed, Boucher et al. [42] have shown that these nitrosated compounds are diabetogenic in CD1 mice, producing type 2 diabetes associated with obesity. The following mechanisms have been proposed to explain the diabetogenic effect and other effects of chewing BQ.

**1) Inflammation.** Substances found in betel nut increase the release of inflammatory mediators such as prostanooids, interleukin-6, and tumor necrosis factor- $\alpha$  [43], as well as inducing reactive oxygen species and activating nuclear factor- $\kappa$ B [44], which are changes with the potential to cause chronic inflammation. An increase of C-reactive protein is an independent predictor of type 2 diabetes in apparently healthy women, supporting the hypothesis that subclinical inflammation has a role in the pathogenesis of diabetes [45]. In addition, C-reactive protein can be a predictor of adverse cardiac outcomes [46]. Human studies [47] support the concept that periodontal infection can induce a state of low-grade chronic inflammation, and periodontal therapy has been shown to decrease systemic inflammation [48]. It has also been reported that tumor necrosis factor- $\alpha$  induces insulin resistance [49], and systemic inflammation has been identified as a novel predictor of incident diabetes [50,51].

**2) Effects on adipogenesis, lipolysis, and glucose uptake by adipocyte.** Using mouse 3T3-L1 preadipocytes, Hsu et al. demonstrated that arecoline from betel nut inhibits adipogenic differentiation, induces adenylyl cyclase-dependent lipolysis, and interferes with insulin-induced glucose uptake. Therefore, arecoline-induced adipocyte dysfunction may lead to the development of insulin resistance and metabolic disease [28].

**3) Influence on appetite.** It has been reported that arecoline acts as a competitive inhibitor of  $\gamma$ -aminobutyric acid receptors in the brain, cardiovascular system, and pancreas, suggesting that it may promote an increase in appetite or alter insulin secretion [52].

**A) Cardiovascular disease**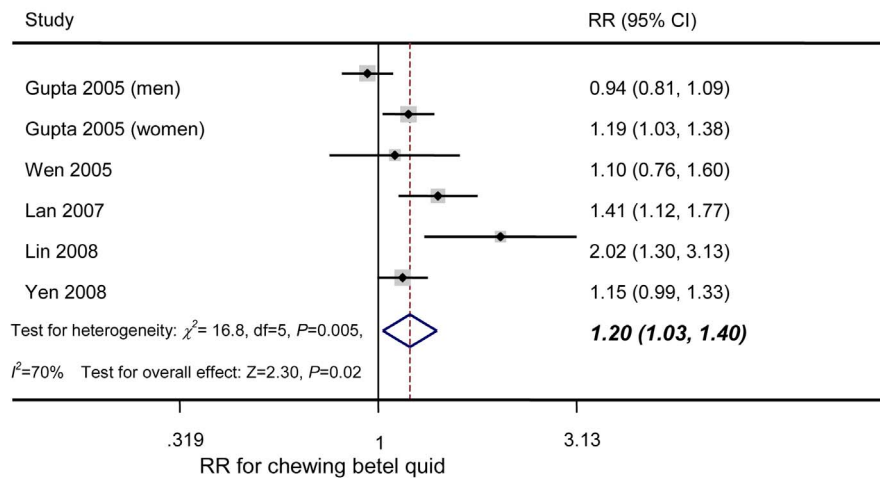**B) All-cause mortality**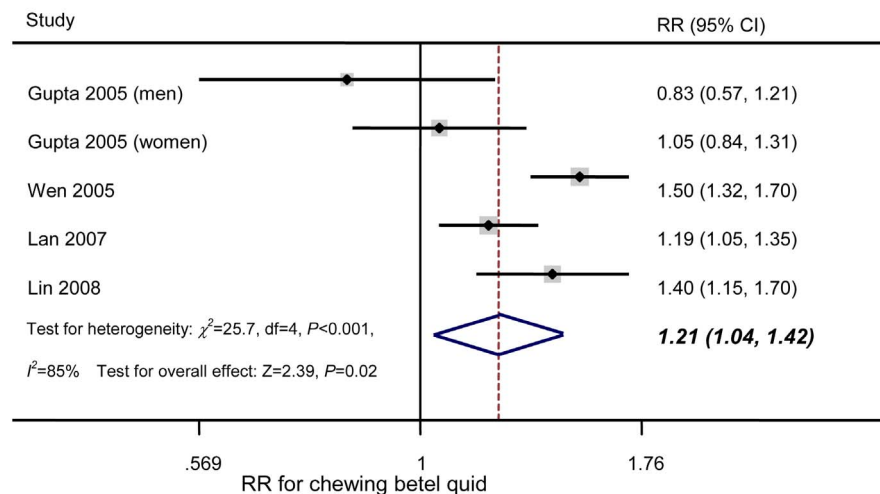**C) Hypertension**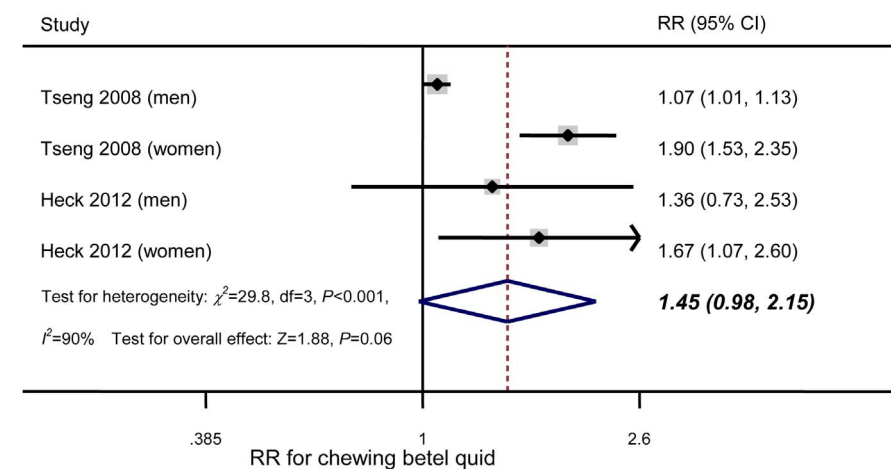

**Figure 3. Association of chewing betel quid with cardiovascular disease, all-cause mortality, and hypertension.** Forest plots show the association between chewing betel quid and the risk of cardiovascular disease, all-cause mortality, and hypertension. CI = confidence interval; RR = relative risk.  
doi:10.1371/journal.pone.0070679.g003

**4) Neurological effects.** A human study showed that chewing BQ has a central sympathetic effect, resulting in an increase of the heart rate and increased blood flow in the external and common carotid arteries [53]. In addition, chewing BQ has been associated with coronary artery spasm due to the parasympathetic effect of arecoline on vessels with abnormal endothelium. Furthermore, Asthana et al. [54] reported that arecoline is an effective muscarinic agonist, which crosses the blood–brain barrier and binds to gamma aminobutyric acid receptors, thereby inducing a range of parasympathetic effects.

**5) Influence on Vitamin D.** The East London Bangladeshi study [55] demonstrated a high prevalence of Vitamin D deficiency among nondiabetic subjects ‘at risk’ of diabetes (spot blood glucose level  $>6.0$  mmol/l  $<2$  h postprandially, or  $>4.6$  mmol/l  $>2$  h postprandially on two separate occasions), while severe deficiency was less common in those ‘not-at-risk’. In addition, chewing BQ is associated with increased expression of the gene coding the enzyme involved in catabolism of Vitamin D (calcitriol) and with a reduction of the serum calcitriol concentration, but not the serum 25(OH)D concentration [56]. Thus, chewing BQ may reduce the activity of available vitamin D.

Recently, vitamin D insufficiency has been recognized as a potential risk factor for metabolic syndrome [57], type 2 diabetes [58] and cardiovascular disease [59], which makes the vitamin D status a potential confounder in any study of BQ chewing since low vitamin D levels are common among south Asians wherever they live [57]. Because chewing BQ may enhance the risks associated with inadequate vitamin D status [56], this is a possible mechanism by which a person’s background can increase cardiometabolic risk, and it has the potential to create a vicious circle that exacerbates risk when both factors are present.

### Strengths and Limitations

The strengths of this meta-analysis were as follows. First, it included several large-scale cohort studies and case-control studies, with a total of 388,134 subjects. The cohort studies had a relatively long follow-up period (range: 2.7–12.1 years; mean: 7.6 years). In most of the studies, analyses were adequately adjusted by using classical coronary risk factors, such as age, gender, smoking, hypertension, dyslipidemia, and body mass index. Furthermore, evaluation of publication bias using the funnel plot, Begg’s test, and Egger’s test revealed no evidence of bias.

This meta-analysis also had some limitations. First, although we searched several databases, we only reviewed English-language reports and this could have led to selection bias. However, we tried to include as many of the pertinent references as much as possible. Second, data from some of the studies showed significant heterogeneity, which may have been at least partly related to differences of epidemiological characteristics (e.g., the frequency and duration of BQ use). Moreover, case-control studies have more potential for bias compared with cohort studies. It has been reported that BQ chewers are more likely to smoke, drink alcohol, and eat spicy foods compared with non-chewers [9,60]. Such potential confounding factors could also have a role in predisposing BQ chewers to various systemic conditions. However, the relative risk was adjusted by classical coronary risk factors in most of the studies, and additional analyses stratified by sex and race

showed a decrease of heterogeneity. Moreover, significant dose-response relationships between BQ consumption and the risk of events were identified in 7 studies [17–19,22,27,30,31].

Third, most studies were performed in Taiwan and few studies were done in other areas. Accordingly, the association between chewing BQ and lifestyle-related diseases deserves further investigation elsewhere in the world.

Fourth, the role of gender in relation to BQ chewing and systemic disease remains unclear. Although we wanted to analyze studies performed only in women, most of the studies only assessed men or had more male than female participants, so we could not do this analysis because of the small number of female subjects [15,20,21,29]. It seems that chewing BQ is more prevalent among men than women in Taiwan where most of the studies were performed [21]. Therefore, we have not been able to assess the influence of gender in relationship to cardiovascular disease and metabolic disease among BQ chewers. Accordingly, the results obtained by this meta-analysis are more relevant to men than women.

Even with the above-mentioned limitations, these observational studies provide useful evidence regarding the potential influence of chewing BQ on metabolic diseases, and the overall pooled estimates of risk were robust. Based on our findings, not just physicians but also public health experts and governments should be aware of the risks associated with chewing BQ since use of BQ is the 4th most common addictive habit worldwide. The relationship between BQ and lifestyle-related disease should be investigated by performing further studies, including well-designed and controlled cohort studies in various parts of the world.

### Conclusions

In conclusion, chewing BQ is associated with an increased risk of several metabolic diseases, as well as an elevated risk of cardiovascular disease and all-cause mortality. Thus, in addition to prevention of oral cancer, stopping BQ use could be beneficial with respect to metabolic diseases, which may be especially important in view of the rapidly increasing prevalence of such diseases in South-East Asia and the Western Pacific.

### Supporting Information

**Table S1 Newcastle-Ottawa quality assessment scale for observational studies.**

(DOCX)

**Checklist S1 PRISMA Checklist.**

(DOCX)

### Acknowledgments

We would like to express our gratitude to Prof. Tony Hsiu-Hsi Chen for providing additional information.

### Author Contributions

Conceived and designed the experiments: TY. Performed the experiments: TY KH. Analyzed the data: TY. Contributed reagents/materials/analysis tools: TY. Wrote the paper: TY. Reviewed/edited the manuscript: TY KH TK.

## References

- WHO (2012) Fact sheet on overweight and obesity. [article online], Available from <http://www.who.int/mediacentre/factsheets/fs311/en/>. Accessed 2013 January 29.
- Alberti KG, Eckel RH, Grundy SM, Zimmet PZ, Cleeman JI, et al (2009) Harmonizing the metabolic syndrome: a joint interim statement of the International Diabetes Federation Task Force on Epidemiology and Prevention; National Heart, Lung, and Blood Institute; American Heart Association; World Heart Federation; International Atherosclerosis Society; and International Association for the Study of Obesity. *Circulation* 120: 1640–1645.
- Mottillo S, Filion KB, Genest J, Joseph L, Pilote L, et al (2010) The metabolic syndrome and cardiovascular risk: a systematic review and meta-analysis. *J Am Coll Cardiol* 56: 1113–1132.
- Gu D, Reynolds K, Wu X, Chen J, Duan X, et al (2005) Prevalence of the metabolic syndrome and overweight among adults in China. *Lancet* 365: 1398–1405.
- Nestel P, Lyu R, Low LP, Sheu WH, Nitiyanant W, et al (2007) Metabolic syndrome: recent prevalence in East and Southeast Asian populations. *Asia Pac J Clin Nutr* 16: 362–367.
- Chan JC, Malik V, Jia W, Kadowaki T, Yajnik CS, et al (2009) Diabetes in Asia: epidemiology, risk factors, and pathophysiology. *JAMA* 301: 2129–2140.
- Lopez AD, Mathers CD, Ezzati M, Jamison DT, Murray CJ (2006) Global and regional burden of disease and risk factors, 2001: systematic analysis of population health data. *Lancet* 367: 1747–1757.
- IARC WHO (2004) Betel quid and Areca nut chewing. [article online], Available from <http://monographs.iarc.fr/ENG/Monographs/vol85/mono85-6.pdf>. Accessed 2013 January 29.
- Gupta PC, Warnakulasuriya S (2002) Global epidemiology of areca nut usage. *Addict Biol* 7: 77–83.
- Gupta PC, Ray CS (2004) Epidemiology of betel quid usage. *Ann Acad Med Singapore* 33: 31–36.
- Boucher BJ, Mannan N (2002) Metabolic effects of the consumption of Areca catechu. *Addict Biol* 7: 103–110.
- Chu NS (2002) Neurological aspects of areca and betel chewing. *Addict Biol* 7: 111–114.
- Secretan B, Straif K, Baan R, Grosse Y, El Ghissassi F, et al (2009) WHO International Agency for Research on Cancer Monograph Working Group. A review of human carcinogens—Part E: tobacco, areca nut, alcohol, coal smoke, and salted fish. *Lancet Oncol* 10: 1033–1034.
- Seymour GJ, Ford PJ, Cullinan MP, Leishman S, Yamazaki K (2007) Relationship between periodontal infections and systemic disease. *Clin Microbiol Infect* 13 (Suppl 4): 3–10.
- Gupta PC, Pednekar MS, Parkin DM, Sankaranarayanan R (2005) Tobacco associated mortality in Mumbai (Bombay) India. Results of the Bombay Cohort Study. *Int J Epidemiol* 34: 1395–1402.
- Wen CP, Tsai SP, Cheng TY, Chen CJ, Levy DT, et al (2005) Uncovering the relation between betel chewing and cigarette smoking in Taiwan. *Tob Control* 14 (Suppl 1): i16–i22.
- Lan TY, Chang WC, Tsai YJ, Chuang YL, Lin HS, et al. (2007) Areca nut chewing and mortality in an elderly cohort study. *Am J Epidemiol* 165: 677–683.
- Lin WY, Chiu TY, Lee LT, Lin CC, Huang CY, et al. (2008) Betel nut chewing is associated with increased risk of cardiovascular disease and all-cause mortality in Taiwanese men. *Am J Clin Nutr* 87: 1204–1211.
- Yen AM, Chen LS, Chiu YH, Boucher BJ, Chen TH (2008) A prospective community-population-registry based cohort study of the association between betel-quid chewing and cardiovascular disease in men in Taiwan. *Am J Clin Nutr* 87: 70–78.
- Tseng CH (2008) Betel nut chewing is associated with hypertension in Taiwanese type 2 diabetic patients. *Hypertens Res* 31: 417–423.
- Heck JE, Marcotte EL, Argos M, Parvez F, Ahmed A, et al (2012) Betel quid chewing in rural Bangladesh: prevalence, predictors and relationship to blood pressure. *Int J Epidemiol* 41: 462–471.
- Tung TH, Chiu YH, Chen LS, Wu HM, Boucher BJ, et al. (2004) Keelung Community-based Integrated Screening programme No. 2. A population-based study of the association between areca nut chewing and type 2 diabetes mellitus in men (Keelung Community-based Integrated Screening programme No. 2). *Diabetologia* 47: 1776–1781.
- Tseng CH (2010) Betel nut chewing and incidence of newly diagnosed type 2 diabetes mellitus in Taiwan. *BMC Res Notes* 3: 228.
- Chang WC, Hsiao CF, Chang HY, Lan TY, Hsiung CA, et al (2006) Betel nut chewing and other risk factors associated with obesity among Taiwanese male adults. *Int J Obes (Lond)* 30: 359–363.
- Lin CF, Wang JD, Chen PH, Chang SJ, Yang YH, et al. (2006) Predictors of betel quid chewing behavior and cessation patterns in Taiwan aborigines. *BMC Public Health* 6: 271.
- Ho CS, Tsai AC (2007) Prevalence of overweight and obesity and its associated factors in aboriginal Taiwanese: findings from the 2001 National Health Interview Survey in Taiwan. *Asia Pac J Clin Nutr* 16: 572–579.
- Lin WY, Pi-Sunyer FX, Liu CS, Li TC, Li CI, et al (2009) Betel nut chewing is strongly associated with general and central obesity in Chinese male middle-aged adults. *Obesity (Silver Spring)* 17: 1247–1254.
- Hsu HF, Tsou TC, Chao HR, Shy CG, Kuo YT, et al (2010) Effects of arecoline on adipogenesis, lipolysis, and glucose uptake of adipocytes—A possible role of betel-quid chewing in metabolic syndrome. *Toxicol Appl Pharmacol* 245: 370–377.
- Chung FM, Chang DM, Chen MP, Tsai JC, Yang YH, et al (2006) Areca nut chewing is associated with metabolic syndrome: role of tumor necrosis factor- $\alpha$ , leptin, and white blood cell count in betel nut chewing-related metabolic derangements. *Diabetes Care* 29: 1714.
- Guh JY, Chuang LY, Chen HC (2006) Betel-quid use is associated with the risk of the metabolic syndrome in adults. *Am J Clin Nutr* 83: 1313–1320.
- Yen AM, Chiu YH, Chen LS, Wu HM, Huang CC, et al (2006) A population-based study of the association between betel-quid chewing and the metabolic syndrome in men. *Am J Clin Nutr* 83: 1153–1160.
- von Elm E, Altman DG, Egger M, Pocock SJ, Gøtzsche PC, et al. (2008) The Strengthening of Reporting of Observational Studies in Epidemiology (STROBE) statement: guidelines for reporting observational studies. *J Clin Epidemiol* 61: 344–349.
- Wells G, Shea B, O'Connell D, Peterson J, Welch V, et al. The Newcastle-Ottawa Scale (NOS) for assessing the quality of nonrandomised studies in meta-analyses. [article online], Available from [http://www.ohri.ca/programs/clinical\\_epidemiology/oxford.asp](http://www.ohri.ca/programs/clinical_epidemiology/oxford.asp). Accessed 2013 January 29.
- Higgins JP, Thompson SG (2002) Quantifying heterogeneity in a meta-analysis. *Stat Med* 21: 1539–1558.
- Stroup DF, Berlin JA, Morton SC, Olkin I, Williamson GD, et al (2000) Meta-analysis of observational studies in epidemiology: a proposal for reporting. Meta-analysis Of Observational Studies in Epidemiology (MOOSE) group. *JAMA* 283: 2008–2012.
- Liberati A, Altman DG, Tetzlaff J, Mulrow C, Gotzsche PC, et al (2009) The PRISMA statement for reporting systematic reviews and meta-analyses of studies that evaluate health care interventions: explanation and elaboration. *Ann Intern Med* 151: W65–W94.
- Expert Panel on Detection, Evaluation, and Treatment of High Blood Cholesterol in Adults (2001) Executive Summary of The Third Report of The National Cholesterol Education Program (NCEP) Expert Panel on Detection, Evaluation, And Treatment of High Blood Cholesterol In Adults (Adult Treatment Panel III). *JAMA* 285: 2486–2497.
- American Diabetes Association: clinical practice recommendations 1999 (1999) *Diabetes Care*. 22 (Suppl 1): S1–S114.
- Javed F, Näsström K, Benchimol D, Altamash M, Klinge B, et al. (2007) Comparison of periodontal and socioeconomic status between subjects with type 2 diabetes mellitus and non-diabetic controls. *J Periodontol* 78: 2112–2119.
- Hamissi J, Porsamimi J, Naseh MR, Mosalaei S (2009) Oral hygiene and periodontal status of hemodialyzed patients with chronic renal failure in Qazvin, Iran. *East Afr J Public Health* 6: 108–111.
- Zhang LN, Yang YM, Xu ZR, Gui QF, Hu QQ (2010) Chewing substances with or without tobacco and risk of cardiovascular disease in Asia: a meta-analysis. *J Zhejiang Univ Sci B*. 11: 681–689.
- Boucher BJ, Ewen SW, Stowers JM (1994) Betel nut (Areca catechu) consumption and the induction of glucose intolerance in adult CD1 mice and in their F1 and F2 offspring. *Diabetologia* 37: 49–55.
- Jeng JH, Wang YJ, Chiang BL, Lee PH, Chan CP, et al (2003) Roles of keratinocyte inflammation in oral cancer: regulating the prostaglandin E2, interleukin-6 and TNF- $\alpha$  production of oral epithelial cells by areca nut extract and arecoline. *Carcinogenesis* 24: 1301–1315.
- Lin SC, Lu SY, Lee SY, Lin CY, Chen CH, et al. (2005) Areca (betel) nut extract activates mitogen-activated protein kinases and NF- $\kappa$ B in oral keratinocytes. *Int J Cancer* 116: 526–535.
- Hu F, Meigs JB, Li TY, Rifai N, Manson JE (2004) Inflammatory markers and risk of developing type 2 diabetes in women. *Diabetes* 53: 693–700.
- Low AF, Seow SC, Yeoh KG, Lim YT, Tan HC, et al. (2004) High-sensitivity C-reactive protein is predictive of medium-term cardiac outcome in high-risk Asian patients presenting with chest pain syndrome without myocardial infarction. *Ann Acad Med Singapore* 33: 407–412.
- Slade GD, Ghezzi EM, Heiss G, Beck JD, Riche E, et al. (2003) Relationship between periodontal disease and C-reactive protein among adults in the Atherosclerosis Risk in Communities study. *Arch Intern Med* 163: 1172–1179.
- Tonetti MS, D'Aiuto F, Nibali L, Donald A, Storry C, et al (2007) Treatment of periodontitis and endothelial function. *N Engl J Med* 356: 911–920.
- Ling PR, Bistrian BR, Mendez B, Istfan NW (1994) Effects of systemic infusions of endotoxin, tumor necrosis factor, and interleukin-1 on glucose metabolism in the rat: relationship to endogenous glucose production and peripheral tissue glucose uptake. *Metabolism* 43: 279–284.
- Liu S, Tinker L, Song Y, Rifai N, Bonds DE, et al (2007) A prospective study of inflammatory cytokines and diabetes mellitus in a multiethnic cohort of postmenopausal women. *Arch Intern Med* 167: 1676–1685.
- Pradhan AD, Manson JE, Rifai N, Buring JE, Ridker PM (2001) C-reactive protein, interleukin 6, and risk of developing type 2 diabetes mellitus. *JAMA* 286: 327–334.
- Johnston GA, Krogsgaard-Larsen P, Stephanson A (1975) Betel nut constituents as inhibitors of gamma-aminobutyric acid uptake. *Nature* 258: 627–628.

53. Lin SK, Chang YJ, Ryu SJ, Chu NS (2002) Cerebral hemodynamic responses to betel chewing: a Doppler study. *Clin Neuropharmacol* 25: 244–50.
54. Asthana S, Greig NH, Holloway HW, Raffaele KC, Berardi A, et al (1996) Clinical pharmacokinetics of arecoline in subjects with Alzheimer's disease. *Clin Pharmacol Ther* 60: 276–282.
55. Boucher BJ, Mannan N, Noonan K, Hales CN, Evans SJ (1995) Glucose intolerance and impairment of insulin secretion in relation to vitamin D deficiency in east London Asians. *Diabetologia* 38: 1239–1245.
56. Ogunkolade WB, Boucher BJ, Bustin SA, Burrin JM, Noonan K, et al (2006) Vitamin D metabolism in peripheral blood mononuclear cells is influenced by chewing “betel nut” (*Areca catechu*) and vitamin D status. *J Clin Endocrinol Metab* 91: 2612–2617.
57. Lu L, Yu Z, Pan A, Hu FB, Franco OH, et al (2009) Plasma 25-hydroxyvitamin D concentration and metabolic syndrome among middle-aged and elderly Chinese individuals. *Diabetes Care* 32: 1278–83.
58. Tsur A, Feldman BS, Feldhammer I, Hoshen MB, Leibowitz G, et al. (2013) Decreased serum concentrations of 25-hydroxycholecalciferol are associated with increased risk of progression to impaired fasting glucose and diabetes. *Diabetes Care* 36: 1361–7.
59. Thomas GN, ó Hartaigh B, Bosch JA, Pilz S, Loerbroks A, et al (2012) Vitamin D levels predict all-cause and cardiovascular disease mortality in subjects with the metabolic syndrome: the Ludwigshafen Risk and Cardiovascular Health (LURIC) Study. *Diabetes Care* 35: 1158–64.
60. Ko YC, Chiang TA, Chang SJ, Hsieh SF (1992) Prevalence of betel quid chewing habit in Taiwan and related sociodemographic factors. *J Oral Pathol Med* 21: 261–264.
